# Supplementary material for: Antimicrobial Consumption in the Livestock Sector in Bhutan: Volumes, Values, Rates, and Trends for the Period 2017–2021
Source: MDPI journal article supplement (doi:10.3390/antibiotics12020411), 2023-02-18
Supplement: s1 [file s1]

**Table S1.** Comparison of the rates of antimicrobial consumption in Bhutan in 2020 with those of 31 European nations

| Country        | Consumption (tonnes) | Population size (PCU x 1000) | Rate of antimicrobial consumption (mg/PCU) |
|----------------|----------------------|------------------------------|--------------------------------------------|
| Austria        | 43.70                | 942.30                       | 46.30                                      |
| Belgium        | 180.40               | 1745.30                      | 103.40                                     |
| Bhutan         | 0.46                 | 120.88                       | 3.83                                       |
| Bulgaria       | 61.10                | 368.40                       | 166.00                                     |
| Croatia        | 22.60                | 328.90                       | 68.60                                      |
| Cyprus         | 48.30                | 122.60                       | 393.90                                     |
| Czechia        | 39.30                | 699.30                       | 56.30                                      |
| Denmark        | 88.70                | 2384.70                      | 37.20                                      |
| Estonia        | 5.70                 | 115.90                       | 49.20                                      |
| Finland        | 8.00                 | 494.40                       | 16.20                                      |
| France         | 394.40               | 6964.90                      | 56.60                                      |
| Germany        | 684.60               | 8172.80                      | 83.80                                      |
| Greece         | 108.40               | 1216.50                      | 89.10                                      |
| Hungary        | 136.10               | 801.00                       | 169.90                                     |
| Iceland        | 0.50                 | 135.30                       | 3.80                                       |
| Ireland        | 102.90               | 2189.80                      | 47.00                                      |
| Italy          | 689.30               | 3790.40                      | 181.80                                     |
| Latvia         | 4.80                 | 157.60                       | 30.80                                      |
| Lithuania      | 6.20                 | 302.60                       | 20.50                                      |
| Luxembourg     | 1.60                 | 54.40                        | 29.00                                      |
| Malta          | 1.70                 | 14.70                        | 116.10                                     |
| Netherlands    | 156.40               | 3114.90                      | 50.20                                      |
| Norway         | 4.70                 | 2030.80                      | 2.30                                       |
| Poland         | 853.20               | 4541.70                      | 187.90                                     |
| Portugal       | 177.90               | 1012.00                      | 175.80                                     |
| Romania        | 173.70               | 3003.70                      | 57.80                                      |
| Slovakia       | 11.80                | 228.30                       | 51.90                                      |
| Slovenia       | 5.90                 | 176.00                       | 33.30                                      |
| Spain          | 1244.50              | 8067.50                      | 154.30                                     |
| Sweden         | 8.70                 | 786.00                       | 11.10                                      |
| Switzerland    | 27.70                | 806.10                       | 34.30                                      |
| United Kingdom | 214.40               | 7115.20                      | 30.10                                      |

Source: European Medicine Agency [8].

**Table S2.** Comparison by antimicrobial class of the rates of antimicrobial consumption (mg/PCU) in Bhutan in 2020 with those of 31 European nations

| Country     | Aminoglycosides | Amphenicols | 1 <sup>st</sup> and 2 <sup>nd</sup> generation cephalosporins | 3 <sup>rd</sup> and 4 <sup>th</sup> generation cephalosporins | Fluoroquinolones | Penicillins | Sulfonamides | Trimethoprim | Tetracyclines | Others* |
|-------------|-----------------|-------------|---------------------------------------------------------------|---------------------------------------------------------------|------------------|-------------|--------------|--------------|---------------|---------|
| Austria     | 1.4             | 0.4         |                                                               | 0.2                                                           | 0.5              | 9.9         | 3.7          | 0.7          | 23.5          | 0.1     |
| Belgium     | 1.6             | 1.9         | 0.3                                                           | 0.1                                                           | 0.3              | 42.5        | 16.6         | 3.3          | 20.5          | 3.7     |
| Bhutan      | 0.15            | 0.01        |                                                               | 0.04                                                          | 0.03             | 0.2         | 1.8          | 0.3          | 0.5           | 0.8     |
| Bulgaria    | 4.3             | 1.0         |                                                               | 0.1                                                           | 3.7              | 22.3        | 6.8          | 0.8          | 65.9          | 0.5     |
| Croatia     | 2.5             | 1.5         |                                                               | 0.2                                                           | 2.1              | 23.1        | 5.4          | 1.1          | 24.8          | 0.2     |
| Cyprus      | 5.1             | 1.2         |                                                               | 0.4                                                           | 2.2              | 79.4        | 56.8         | 11.3         | 132.0         | 0.7     |
| Czechia     | 2.5             | 0.6         | 0.1                                                           | 0.5                                                           | 1.9              | 18.3        | 8.6          | 1.0          | 15.5          | 0.3     |
| Denmark     | 3.9             | 0.8         |                                                               | <0.01                                                         | <0.01            | 12.0        | 3.1          | 0.6          | 6.0           | 1.0     |
| Estonia     | 3.7             | 0.4         | 0.1                                                           | 0.7                                                           | 1.1              | 13.4        | 4.2          | 0.8          | 13.5          | 0.5     |
| Finland     | 0.1             | 0.2         | <0.01                                                         | <0.01                                                         | 0.1              | 8.4         | 2.8          | 0.6          | 3.7           |         |
| France      | 6.7             | 0.8         | 0.2                                                           | 0.0                                                           | 0.1              | 8.7         | 12.3         | 2.0          | 18.4          | 0.5     |
| Germany     | 2.9             | 0.8         | 0.1                                                           | 0.2                                                           | 0.8              | 33.3        | 7.8          | 1.1          | 18.1          | 1.4     |
| Greece      | 8.6             | 1.1         |                                                               | 0.2                                                           | 2.0              | 15.7        | 8.1          | 1.0          | 43.9          | 0.6     |
| Hungary     | 3.3             | 2.5         | 0.1                                                           | 0.5                                                           | 11.6             | 51.6        | 7.0          | 1.5          | 57.4          | 1.2     |
| Iceland     | 0.6             | 0.0         |                                                               | <0.01                                                         | <0.01            | 2.8         | 0.1          |              | 0.3           |         |
| Ireland     | 3.2             | 1.7         | 0.5                                                           | 0.2                                                           | 0.4              | 12.4        | 4.6          | 0.6          | 19.6          | 0.6     |
| Italy       | 7.5             | 4.9         | 0.1                                                           | 0.2                                                           | 1.2              | 61.1        | 26.7         | 2.6          | 49.0          | 1.7     |
| Latvia      | 4.1             | 0.2         | 0.3                                                           | 0.5                                                           | 1.5              | 6.6         | 1.3          | 0.3          | 7.0           | 0.2     |
| Lithuania   | 0.5             | 0.4         | 0.1                                                           | 0.1                                                           | 1.3              | 6.3         | 4.1          | 0.9          | 2.6           | 0.3     |
| Luxembourg  | 3.0             | 1.0         | 0.1                                                           | 0.5                                                           | 0.8              | 6.6         | 2.9          | 0.6          | 11.4          | 0.4     |
| Malta       | 6.4             | 2.3         | 0.1                                                           | 0.3                                                           | 4.4              | 9.5         | 18.2         | 3.2          | 43.9          | 6.8     |
| Netherlands | 0.6             | 1.5         |                                                               | <0.01                                                         | 0.1              | 12.6        | 8.3          | 1.5          | 16.6          |         |
| Norway      | 0.1             | 0.1         |                                                               | <0.01                                                         | <0.01            | 1.4         | 0.6          | 0.1          | 0.1           | <0.01   |
| Poland      | 7.2             | 2.2         | 0.2                                                           | 0.4                                                           | 12.9             | 61.1        | 8.1          | 1.6          | 45.3          | 2.2     |
| Portugal    | 5.0             | 4.4         |                                                               | 0.4                                                           | 7.3              | 38.9        | 7.2          | 1.4          | 60.4          | 0.4     |
| Romania     | 4.7             | 2.4         | <0.01                                                         | 0.2                                                           | 5.7              | 13.7        | 1.9          | 0.3          | 15.4          | 0.7     |
| Slovakia    | 3.9             | 0.3         | 0.2                                                           | 0.5                                                           | 3.4              | 10.2        | 6.4          | 0.9          | 14.0          | 1.2     |
| Slovenia    | 3.6             | 1.1         | 0.1                                                           | 0.2                                                           | 1.0              | 15.7        | 2.4          | 0.6          | 7.6           |         |
| Spain       | 10.9            | 6.4         | 0.1                                                           | 0.4                                                           | 3.7              | 52.7        | 12.1         | 2.1          | 34.7          | 1.5     |
| Sweden      | 0.5             |             |                                                               | <0.01                                                         |                  | 6.8         | 1.9          | 0.4          | 0.8           | 0.2     |
| Switzerland | 3.1             | 0.7         | 0.1                                                           | 0.1                                                           | 0.2              | 11.0        | 8.3          | 0.7          | 8.4           | 0.1     |

|                |     |     |     |     |     |     |     |      |     |
|----------------|-----|-----|-----|-----|-----|-----|-----|------|-----|
| United Kingdom | 2.5 | 0.6 | 0.1 | 0.1 | 8.0 | 2.9 | 0.6 | 10.2 | 0.6 |
|----------------|-----|-----|-----|-----|-----|-----|-----|------|-----|

Source: European Medicine Agency [8].

\*Metronidazole and nitrofurazone
